# Supplementary material for: Support for targeted sampling of red fox (Vulpes vulpes) feces in Sweden: a method to improve the probability of finding Echinococcus multilocularis
Source: Parasit Vectors. 2016 Nov 29;9:613. doi: 10.1186/s13071-016-1897-3 (PMC5129611; doi:10.1186/s13071-016-1897-3)
Supplement: Additional file 1: Table S1. — Summary of fox feces collected by region, season, year and method. (XLSX 11 kb) [file 13071_2016_1897_MOESM1_ESM.xlsx]

## Sheet: Sheet1
Table S1
Proportion of feces positive for Echinococcus multilocularis, Sweden, 2013-2015. Feces were collected during rodent trapping periods (Method 1) and as focussed efforts before trapping periods (Method 2). Results are presented as a proportion (%) with 95% binomial exact confidence intervals (95% CI).
	Spring 2013			Autumn 2013			Winter 2014			Spring 2014			Autumn 2014			Winter 2015			Spring 2015
	Method 1			Method 1			Method 2			Method 1			Method 1			Method 2			Method 1
	Pa	Nb	% (95%CI)	P	N	% (95%CI)	P	N	%(95%CI)	P	N	% (95%CI)	P	N	% (95%CI)	P	N	% (95%CI)	P	N	% (95%CI)
Katrineholm	2	21	9.5 (1.2-30.4)	1	36	2.8 (0.1-14.5)	0	39	0 (0-9.0)	0	13	0 (0-24.7)	0	14	0 (0-23.2)	0	66	0 (0-5.4)	---	---	---
Uddevalla	2	47	4.3 (0.5-14.5)	0	15	0 (0-21.8)	3	90	3.3 (0.7-9.4)	0	38	0 (0-9.3)	3	19	15.8 (3.4-39.6)	10	127	7.9 (3.8-14.0)	---	---	---
Gnesta/Nyköping	0	0	0 (0-100)	0	2	0 (0-84.2)	5	26	19.2 (6.6-39.4)	1	9	11.1 (0.3-48.2)	0	0	0 (0-100)	10	37	27.0 (13.8-44.1)	2	6	33.3 (4.3-77.7)
Vetlanda/Växjö	0	6	0 (0-45.9)	0	0	0 (0-100)	2	50	4 (0.5-13.7)	0	3	0 (0-70.6)	0	0	0 (0-100)	0	50	0 (0-7.1)	0	0	0 (0-100)
	a=number of positives
	b=total number of feces
